# Supplementary material
Source: PubMed Central journal article supplement (PMC4932788)

## Jinsi ya kupasha moto maziwa ya mama kwa usalama

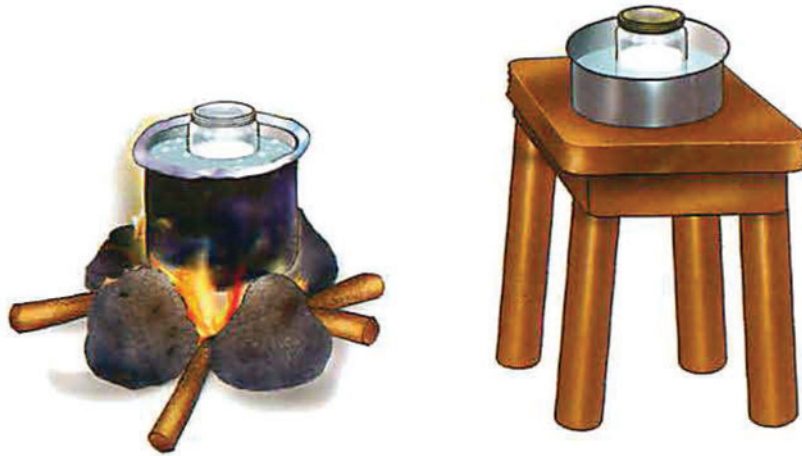

- \* Kupasha moto maziwa ya mama ni njia ya kuuu VVU kwenye maziwa ya mama bila kuharibu virutubishi na kinga mwili zilizomo kwenye maziwa ya mama. Hii inamwezesha mama anayeishi na VVU kumlisha mtoto maziwa yake.
- \* Kila mara osha vyombo utakavyotumia kukamulia na kupasha moto maziwa yako kwa maji safi na sabuni. Ni vyema kuchemsha vyombo hivyo baada ya kuviosha ili kuhakikisha ni safi na salama.
- \* Kamua maziwa yako kama ilivyoelekezwa kwenye kipeperushi cha Jinsi ya Kukamua Maziwa ya Mama. Hakikisha umekamua maziwa yote kwenye matiti yote.
- \* Weka maziwa yote uliyokamua kwenye gilasi inayohimili joto isiyo ya plastiki. Kiasi cha maziwa unayoweka kiwe kati ya mililita za ujazo 50 hadi 150. Kama umekamua maziwa mengi unaweza kuyagawanya kwenye gilasi 2.

- \* Weka gilasi yenye maziwa ndani ya sufuria yenye maji. Hakikisha ujazo wa maji kwenye sufuria unapita ujazo wa maziwa kwenye gilasi kwa kiasi cha vidole viwili ili kuhakikisha maziwa yanapata joto sawa sawa.
- \* Injika sufuria kwenye moto mkali na yaache maji yachemke sawasawa. Ni vyema kukaa karibu na jiko kwani maji yanatakiwa yachemke kwa dakika chache tu. Kuyaacha maji yachemke kwa muda mrefu kutaharibu baadhi ya virutubishi vilivyomo kwenye maziwa.
- \* Ondoa gilasi yenye maziwa kwenye maji mara tu maji yakishachemka. Yaache maziwa yapoe kufikia joto la kawaida kwa kuyaweka kwenye chombo chenye maji baridi, au yaache yapoe yenyewe.
- \* Funika maziwa kwa mfuniko au kisahani safi kuepuka yasiingie uchafu.
- \* Mtoto anaweza kuendelea kulishwa maziwa haya ndani ya kipindi cha saa 6 baada ya kuyachemsha.
- \* Kila mara mlishe mtoto kwa kutumia kikombe cha wazi kilicho safi. Hata mtoto mchanga hujifunza haraka kunywa kwa kikombe. Epuka kutumia chupa na chuchu kwa vile ni vigumu kusafisha, pia huweza kumsababishia mtoto maradhi.

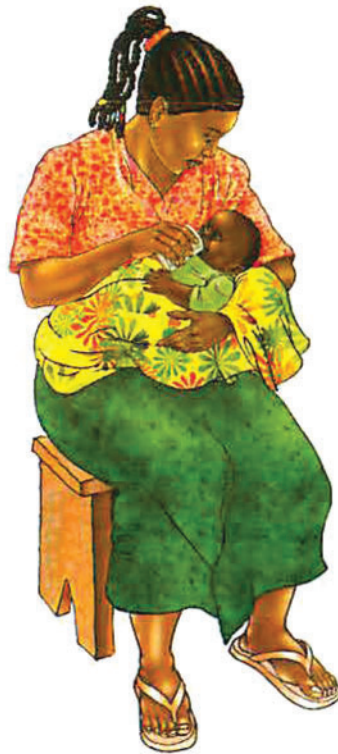

Supplement: Supp_Data.pdf [file Supp_Data.pdf]
